# Supplementary material for: In Silico Prediction and Analysis of Caenorhabditis EF-hand Containing Proteins
Source: PubMed Central journal article supplement (PMC3360750; doi:10.1371/journal.pone.0036770), 2012-05-25
Supplement: pone.0036770.s001.pdf [file pone.0036770.s001.pdf]

**Table S1.** EF-hand containing proteins in *Caenorhabditis*

| UniProtID/gi | Predicted Name                     | Organism           | Length | EF-Hands | Other domain | PE | Molecular Function   | Source   | Biological function                      | Source |
|--------------|------------------------------------|--------------------|--------|----------|--------------|----|----------------------|----------|------------------------------------------|--------|
| G0NP24       | HP CAEBREN_11606                   | <i>C. brenneri</i> | 171    | 4        |              | P  |                      |          |                                          |        |
| E3LG34       | CRE-CAL-2                          | <i>C. remanei</i>  | 171    | 4        |              | P  | CaB                  | IEA      |                                          |        |
| E3LNK3       | CRE-CAL-1                          | <i>C. remanei</i>  | 198    | 4        |              | P  | CaB                  | IEA      |                                          |        |
| P04630       | CAL-1                              | <i>C. elegans</i>  | 161    | 4        |              | T  | CaB                  | IEA      |                                          |        |
| G0MP03       | HP CAEBREN_30810                   | <i>C. brenneri</i> | 168    | 4        |              | P  |                      |          |                                          |        |
| 268557584    | CBR-CAL-1                          | <i>C. briggsae</i> | 180    | 4        |              |    |                      |          |                                          |        |
| 268552973    | CBR-CAL-3                          | <i>C. briggsae</i> | 164    | 4        |              |    |                      |          |                                          |        |
| E3M5U3       | CRE-CAL-3                          | <i>C. remanei</i>  | 231    | 4        |              | P  | CaB                  | IEA      |                                          |        |
| G0P5R9       | HP CAEBREN_12026                   | <i>C. brenneri</i> | 181    | 4        |              | P  |                      |          |                                          |        |
| A8XBN2       | CBR-CAL-3                          | <i>C. briggsae</i> | 233    | 4        |              | P  | CaB                  | IEA      |                                          |        |
| E3M5L0       | Uncharacterized                    | <i>C. remanei</i>  | 182    | 4        |              | P  | CaB                  | IEA      |                                          |        |
| E3NKA0       | HP CRE_15028                       | <i>C. remanei</i>  | 290    | 3        |              | P  | CaB                  | IEA      |                                          |        |
| O18058       | CAL-4                              | <i>C. elegans</i>  | 182    | 3        |              | P  | CaB                  | IEA      |                                          |        |
| C6KRM4       | T07G12.1b                          | <i>C. elegans</i>  | 208    | 3        |              | P  | CaB                  | IEA      |                                          |        |
| O16305       | Calmodulin (CMD-1)                 | <i>C. elegans</i>  | 149    | 4        |              | T  | CaB, protein binding | IEA, IPI | apoptosis, reproduction                  | IMP    |
| C6KRM3       | T07G12.1a                          | <i>C. elegans</i>  | 236    | 3        |              | P  | CaB                  | IEA      |                                          |        |
| Q94288       | Calmodulin related genes protein 3 | <i>C. elegans</i>  | 167    | 4        |              | T  | CaB                  | IEA      |                                          |        |
| 115534350    | CAL-3                              | <i>C. elegans</i>  | 234    | 4        |              |    |                      |          |                                          |        |
| 341889270    | HP CAEBREN_06721                   | <i>C. brenneri</i> | 201    | 2        |              |    |                      |          |                                          |        |
| E3LNL5       | HP CRE_27132                       | <i>C. remanei</i>  | 210    | 4        |              | P  | CaB                  | IEA      |                                          |        |
| P90802       | HP E02A10.3                        | <i>C. elegans</i>  | 202    | 4        |              | T  | CaB                  | IEA      |                                          |        |
| A8Y3P8       | HP CBG23534                        | <i>C. briggsae</i> | 201    | 4        |              | P  | CaB                  | IEA      |                                          |        |
| Q09665       | Troponin C, isoform 2 (TNC-2)      | <i>C. elegans</i>  | 160    | 4        |              | T  | CaB                  | IEA      | reproduction, larval development, growth | IMP    |
| A8WSS9       | CBR-TNC-2                          | <i>C. briggsae</i> | 160    | 4        |              | P  | CaB                  | IEA      |                                          |        |
| 268532318    | CBR-TNC-2                          | <i>C. briggsae</i> | 159    | 4        |              |    |                      |          |                                          |        |

|           |                     |                            |     |   |  |   |     |     |                                                                                                   |     |
|-----------|---------------------|----------------------------|-----|---|--|---|-----|-----|---------------------------------------------------------------------------------------------------|-----|
| Q11083    | HP B0563.7          | <i>C. elegans</i>          | 229 | 4 |  | T | CaB | IEA |                                                                                                   |     |
| Q95XF6    | HP Y73B3A.12        | <i>C. elegans</i>          | 116 | 4 |  | P | CaB | IEA | apoptosis, endocytosis, reproduction, cell migration, embryo development, growth, mitosis         | IMP |
| E3MRT8    | HP CRE_14767        | <i>C. remanei</i>          | 230 | 4 |  | P | CaB |     |                                                                                                   |     |
| 268580583 | HP CBG00175         | <i>C. briggsae</i>         | 230 | 4 |  |   |     |     |                                                                                                   |     |
| 268531200 | HP CBG02410         | <i>C. briggsae</i>         | 145 | 4 |  |   |     |     |                                                                                                   |     |
| Q09980    | HP F12A10.5         | <i>C. elegans</i>          | 145 | 4 |  | T | CaB | IEA |                                                                                                   |     |
| E3M4N3    | HP CRE_11951        | <i>C. remanei</i>          | 145 | 4 |  | P | CaB | IEA |                                                                                                   |     |
| A8WME8    | HP CBG_00175        | <i>C. briggsae</i><br>AF16 | 172 | 4 |  | P | CaB | IEA |                                                                                                   |     |
| A8WUD8    | HP CBG_02410        | <i>C. briggsae</i><br>AF16 | 150 | 4 |  | P | CaB | IEA |                                                                                                   |     |
| B3GEK4    | Troponin C          | <i>C. brenneri</i>         | 150 | 4 |  | T | CaB | IEA |                                                                                                   |     |
| E3MX54    | CRE-PAT-10          | <i>C. remanei</i>          | 200 | 4 |  | P | CaB | IEA |                                                                                                   |     |
| A8XC16    | HP CBG_11013        | <i>C. briggsae</i><br>AF16 | 201 | 4 |  | P | CaB | IEA |                                                                                                   |     |
| Q18136    | Vitellogenin-linked | <i>C. elegans</i>          | 156 | 4 |  | T | CaB | IEA |                                                                                                   |     |
| G0M8G3    | CBN-CAL-5           | <i>C. brenneri</i>         | 156 | 4 |  | P | CaB | IEA |                                                                                                   |     |
| G0N500    | HP CAEBREN_26130    | <i>C. brenneri</i>         | 164 | 4 |  | P |     |     |                                                                                                   |     |
| E3LE72    | CRE-CAL-5           | <i>C. remanei</i>          | 156 | 4 |  | P | CaB | IEA |                                                                                                   |     |
| Q21165    | K03A1.4 a           | <i>C. elegans</i>          | 184 | 4 |  | P | CaB | IEA |                                                                                                   |     |
| A8XK99    | CBR-UVT-2           | <i>C. briggsae</i>         | 156 | 4 |  | P | CaB | IEA |                                                                                                   |     |
| E3LD20    | HP CRE_00078        | <i>C. remanei</i>          | 199 | 4 |  | P | CaB | IEA |                                                                                                   |     |
| 115533480 | HP K03A1.4          | <i>C. elegans</i>          | 264 | 4 |  |   |     |     |                                                                                                   |     |
| G0MQV0    | HP CAEBREN_16765    | <i>C. brenneri</i>         | 181 | 3 |  | P |     |     |                                                                                                   |     |
| Q09510    | MLC-4               | <i>C. elegans</i>          | 172 | 3 |  | T | CaB | IEA | protein localization, meiosis, mitosis, embryo & larval development, morphogenesis, cell polarity | IMP |
| A8X9U2    | CBR-MLC-4           | <i>C. briggsae</i>         | 172 | 1 |  | P | CaB | IEA |                                                                                                   |     |
| G0MKR0    | HP CAEBREN_07889    | <i>C. brenneri</i>         | 172 | 1 |  | P |     |     |                                                                                                   |     |
| E3LYJ5    | HP CBG18252         | <i>C. remanei</i>          | 142 | 2 |  | P | CaB | IEA |                                                                                                   |     |

|           |                   |                                   |     |   |  |   |     |     |                         |     |
|-----------|-------------------|-----------------------------------|-----|---|--|---|-----|-----|-------------------------|-----|
| Q9XVI9    | HP T12D8.6        | <i>C. elegans</i>                 | 142 | 2 |  | T | CaB | IEA |                         |     |
| G0PGC7    | HP CAEBREN_10686  | <i>C. brenneri</i>                | 163 | 4 |  | P |     |     |                         |     |
| Q20804    | cnb-1             | <i>C. elegans</i>                 | 171 | 4 |  | T | CaB | IDA |                         |     |
| E3MQD1    | CRE-CNB-1         | <i>C. remanei</i>                 | 171 | 4 |  | P | CaB | IEA |                         |     |
| E3LTC7    | CRE-MLC-4         | <i>C. remanei</i>                 | 188 | 1 |  | P | CaB | IEA |                         |     |
| Q21201    | HP K04C1.4        | <i>C. elegans</i>                 | 143 | 3 |  | T | CaB | IEA |                         |     |
| G0ML63    | HP CAEBREN_02413  | <i>C. brenneri</i>                | 156 | 3 |  | P |     |     |                         |     |
| A8XK57    | HP CBG14543       | <i>C. briggsae</i>                | 159 | 4 |  | P | CaB | IEA |                         |     |
| B6VBN6    | HP Cbre_JD16.001  | <i>C. brenneri</i>                | 152 | 2 |  | P | CaB | IEA |                         |     |
| G0MPK8    | CBN-MLC-3         | <i>C. brenneri</i>                | 152 | 2 |  | P |     |     |                         |     |
| E3LZ12    | CRE-MLC-3 protein | <i>C. remanei</i>                 | 153 | 2 |  | P | CaB | IEA |                         |     |
| B3GD70    | MLC-3             | <i>C. brenneri</i>                | 152 | 2 |  | T | CaB | IEA |                         |     |
| A8WJV7    | CBR-MLC-3         | <i>C. briggsae</i>                | 153 | 2 |  | P | CaB | IEA |                         |     |
| P53014    | MLC-3             | <i>C. elegans</i>                 | 153 | 2 |  | T | CaB | IEA | locomotion, oviposition | IMP |
| A8XVF9    | HP CBG_19361      | <i>C. briggsae</i><br><i>AF16</i> | 179 | 1 |  | P | CaB | IEA |                         |     |
| Q20358    | HP F43C9.2        | <i>C. elegans</i>                 | 159 | 4 |  | T | CaB | IEA |                         |     |
| G0M8A6    | HP CAEBREN_15606  | <i>C. brenneri</i>                | 159 | 4 |  | P |     |     |                         |     |
| E3LEB5    | HP CRE_00789      | <i>C. remanei</i>                 | 159 | 4 |  | P | CaB | IEA |                         |     |
| 268559254 | HP CBG19361       | <i>C. briggsae</i>                | 137 | 2 |  |   |     |     |                         |     |
| G0NPN1    | HP CAEBREN_20342  | <i>C. brenneri</i>                | 179 | 1 |  | P |     |     |                         |     |
| E3MHC8    | HP CRE_22883      | <i>C. remanei</i>                 | 179 | 1 |  | P | CaB | IEA |                         |     |
| A8XSA6    | HP CBG18268       | <i>C. briggsae</i>                | 147 | 2 |  | P | CaB | IEA |                         |     |
| E3LYH5    | HP CRE_04650      | <i>C. remanei</i>                 | 153 | 2 |  | P | CaB | IEA |                         |     |
| G0ML46    | HP CAEBREN_22778  | <i>C. brenneri</i>                | 153 | 2 |  | P |     |     |                         |     |
| Q20238    | F40F9.8           | <i>C. elegans</i>                 | 179 | 1 |  | P | CaB | IEA |                         |     |
| Q69Z12    | HP K08E3.10       | <i>C. elegans</i>                 | 153 | 2 |  | P | CaB | IEA |                         |     |
| 17560804  | HP F40F9.8        | <i>C. elegans</i>                 | 137 | 1 |  |   |     |     |                         |     |
| E3N7H9    | HP CRE_13655      | <i>C. remanei</i>                 | 172 | 5 |  | P | CaB | IEA |                         |     |
| Q95Y96    | HP M04F3.4        | <i>C. elegans</i>                 | 157 | 4 |  | T | CaB | IEA |                         |     |
| 351050110 | M04F3.4 a         | <i>C. elegans</i>                 | 172 | 5 |  |   |     |     |                         |     |

|           |                  |                    |      |   |     |   |                    |     |                                                                |     |
|-----------|------------------|--------------------|------|---|-----|---|--------------------|-----|----------------------------------------------------------------|-----|
| 17561748  | HP F59D6.7       | <i>C. elegans</i>  | 213  | 4 |     |   |                    |     |                                                                |     |
| Q9TZM5    | bath-25          | <i>C. elegans</i>  | 364  | 2 | BTB | P | CaB                | IEA |                                                                |     |
| O16343    | F59D6.7          | <i>C. elegans</i>  | 195  | 4 |     | P | CaB                | IEA |                                                                |     |
| A8XLP7    | HP CBG15199      | <i>C. briggsae</i> | 233  | 5 |     | P | CaB                | IEA | ST                                                             | IEA |
| E3MSP5    | HP CRE_16173     | <i>C. remanei</i>  | 235  | 6 |     | P | CaB                | IEA | ST                                                             | IEA |
| A8WVU5    | HP CBG03955      | <i>C. briggsae</i> | 173  | 5 |     | P | CaB                | IEA |                                                                |     |
| E3N4M5    | HP CRE_29149     | <i>C. remanei</i>  | 186  | 2 |     | P | CaB                | IEA |                                                                |     |
| G0N5F2    | HP CAEBREN_02194 | <i>C. brenneri</i> | 189  | 4 |     | P |                    |     |                                                                |     |
| A8VT39    | Spectrin         | <i>C. remanei</i>  | 171  | 2 |     | T | CaB                | IEA |                                                                |     |
| E3MML2    | HP CRE_03312     | <i>C. remanei</i>  | 170  | 2 |     | P | CaB                | IEA |                                                                |     |
| Q21408    | spc-1            | <i>C. elegans</i>  | 2427 | 2 | SH3 | T | CaB                | IEA | Larval development, morphogenesis, growth, locomotion, mitosis | IMP |
| E3LCP1    | CRE-SPC-1        | <i>C. remanei</i>  | 2370 | 2 | SH3 | P | CaB                | IEA |                                                                |     |
| E3LNI9    | CRE-ATN-1        | <i>C. remanei</i>  | 921  | 2 | CH  | P | CaB, actin binding | IEA |                                                                |     |
| 268578695 | CBR-SPC-1        | <i>C. briggsae</i> | 2427 | 2 | SH3 |   |                    |     |                                                                |     |
| G2J6D1    | CBR-MLC-2.2      | <i>C. briggsae</i> | 170  | 2 |     | P |                    |     |                                                                |     |
| 341874657 | CBN-SPC-1        | <i>C. brenneri</i> | 2427 | 2 | SH3 |   |                    |     |                                                                |     |
| A8WWQ4    | CBR-NCS-2        | <i>C. briggsae</i> | 190  | 3 |     | P | CaB                | IEA |                                                                |     |
| A8Y4I1    | CBR-CNB-1        | <i>C. briggsae</i> | 171  | 4 |     | P | CaB                | IEA |                                                                |     |
| A8X5Q4    | CBR-NCS-3        | <i>C. briggsae</i> | 174  | 2 |     | P | CaB                | IEA |                                                                |     |
| A8X9R8    | Uncharacterized  | <i>C. briggsae</i> | 196  | 2 |     | P | CaB                | IEA |                                                                |     |
| A8XBR6    | CBR-PAT-10       | <i>C. briggsae</i> | 161  | 4 |     | P | CaB                | IEA |                                                                |     |
| A8WPJ8    | CBR-CMD-1        | <i>C. briggsae</i> | 149  | 4 |     | P | CaB                | IEA |                                                                |     |
| A8XQM5    | Uncharacterized  | <i>C. briggsae</i> | 224  | 3 |     | P | CaB                | IEA |                                                                |     |
| A8WYJ2    | Uncharacterized  | <i>C. briggsae</i> | 199  | 3 |     | P | CaB                | IEA |                                                                |     |
| A8X2U3    | Uncharacterized  | <i>C. briggsae</i> | 456  | 3 |     | P | CaB                | IEA |                                                                |     |
| A8XEQ0    | Uncharacterized  | <i>C. briggsae</i> | 81   | 4 |     | P | CaB                | IEA |                                                                |     |
| B3GDA0    | Troponin C       | <i>C. brenneri</i> | 161  | 4 |     | T | CaB                | IEA |                                                                |     |
| B3GD87    | Troponin C       | <i>C. brenneri</i> | 37   | 1 |     | T | CaB                | IEA |                                                                |     |
| D1P8J5    | Uncharacterized  | <i>C. elegans</i>  | 176  | 2 |     | P | CaB                | IEA |                                                                |     |
| Q9N2Y1    | Uncharacterized  | <i>C. elegans</i>  | 196  | 2 |     | T | CaB                | IEA | larval development, growth                                     | IMP |

|        |                      |                    |      |   |              |   |                         |     |                                                                                                                        |     |
|--------|----------------------|--------------------|------|---|--------------|---|-------------------------|-----|------------------------------------------------------------------------------------------------------------------------|-----|
| Q9XXN7 | F21A10.1a            | <i>C. elegans</i>  | 224  | 3 |              | T | CaB                     | IEA |                                                                                                                        |     |
| Q9U2A6 | Y48B6A.6a            | <i>C. elegans</i>  | 687  | 2 |              | T | CaB                     | IEA |                                                                                                                        |     |
| Q3V5K4 | Uncharacterized      | <i>C. elegans</i>  | 97   | 2 |              | P | CaB                     | IEA |                                                                                                                        |     |
| A8XMZ5 | Y48B6A.6c            | <i>C. elegans</i>  | 179  | 2 |              | P | CaB                     | IEA |                                                                                                                        |     |
| Q8I0Z7 | Y48B6A.6b            | <i>C. elegans</i>  | 203  | 2 |              | T | CaB                     | IEA |                                                                                                                        |     |
| Q2L6W4 | Uncharacterized      | <i>C. elegans</i>  | 43   | 1 |              | T | CaB                     | IEA |                                                                                                                        |     |
| Q18874 | C56A3.6a             | <i>C. elegans</i>  | 477  | 3 |              | T | CaB                     | IEA |                                                                                                                        |     |
| Q95ZR9 | calcium sensor 3     | <i>C. elegans</i>  | 199  | 4 |              | T | CaB                     | IEA |                                                                                                                        |     |
| P91423 | Uncharacterized      | <i>C. elegans</i>  | 81   | 2 |              | T | CaB                     | IEA |                                                                                                                        |     |
| Q8MYM6 | Y39B6A.38            | <i>C. briggsae</i> | 410  | 1 | EH           | T | CaB                     | IEA |                                                                                                                        |     |
| Q9BIF4 | EHS-1                | <i>C. briggsae</i> | 796  | 2 | EH           | T | CaB                     | IEA |                                                                                                                        |     |
| Q18092 | C18E9.1              | <i>C. elegans</i>  | 171  | 4 |              | T | CaB                     | IEA | embryo development                                                                                                     | IMP |
| P91328 | Troponin C or PAT 10 | <i>C. elegans</i>  | 161  | 4 |              | T | CaB                     | IEA | Embryo/larval development, locomotion, growth, muscle contraction, endocytosis, reproduction, skeletal muscle assembly | IMP |
| A6PVB9 | F21A10.1b            | <i>C. elegans</i>  | 145  | 3 |              | P | CaB                     | IEA |                                                                                                                        |     |
| O76670 | Uncharacterized      |                    | 236  | 6 |              | T | CaB                     | IEA | ST                                                                                                                     | IEA |
| P36609 | NCS-2                |                    | 190  | 3 |              | T | CaB                     | IEA |                                                                                                                        |     |
| A8Y3R8 | CBR-ATN-1            | <i>C. briggsae</i> | 894  | 2 | CH           | P | CaB, actin binding      | IEA |                                                                                                                        |     |
| A8XJE3 | CBR-SPC-1            | <i>C. briggsae</i> | 2467 | 2 | SH3          | P | CaB                     | IEA |                                                                                                                        |     |
| Q9TXC0 | Alpha-ACTININ        | <i>C. elegans</i>  | 910  | 2 | CH           | T | CaB, actin binding      | IEA |                                                                                                                        |     |
| Q9XVU8 | W04D2.1              | <i>C. elegans</i>  | 894  | 2 | CH           | T | CaB, actin binding      | IEA |                                                                                                                        |     |
| Q23158 | W04D2.1a             | <i>C. elegans</i>  | 920  | 2 | CH           | T | CaB, actin binding      | IEA | embryo development, mitosis                                                                                            | IMP |
| A8X1E0 | CBR-PLC-4            | <i>C. briggsae</i> | 752  | 2 | PH, X, Y, C2 | P | CaB, actin binding, PLC | IEA | ST, lipid metabolic                                                                                                    | IEA |
| Q21754 | PLC4                 | <i>C. elegans</i>  | 751  | 2 | X, Y, C2, PH | T | CaB, actin binding, PLC | IEA | ST, lipid metabolic                                                                                                    | IEA |
| A8Y4A7 | Uncharacterized      | <i>C. briggsae</i> | 261  | 1 | Thr          | P | CaB                     | IEA | ST                                                                                                                     | IEA |
| A8WWN1 | Uncharacterized      | <i>C. briggsae</i> | 143  | 3 |              | P | CaB                     | IEA | ST                                                                                                                     | IEA |
| A8X8U9 | Uncharacterized      | <i>C. briggsae</i> | 195  | 3 |              | P | CaB                     | IEA | ST                                                                                                                     | IEA |
| A8X3T5 | CBR-CBN-1            | <i>C. briggsae</i> | 710  | 8 |              | P | CaB                     | IEA | ST                                                                                                                     | IEA |
| Q9TZ48 | CaBP1                | <i>C. elegans</i>  | 588  | 8 |              | T | CaB                     | IEA | ST                                                                                                                     | IEA |

|        |                  |                    |      |   |         |   |                                                   |     |                                                                  |     |
|--------|------------------|--------------------|------|---|---------|---|---------------------------------------------------|-----|------------------------------------------------------------------|-----|
| Q22157 | T04F3.2          | <i>C. elegans</i>  | 260  | 2 | Thr     | T | CaB                                               | IEA | ST                                                               | IEA |
| Q9TZ47 | CaBP1            | <i>C. elegans</i>  | 482  | 8 |         | T | CaB                                               | IEA | ST                                                               | IEA |
| Q86S18 | CaBP1            | <i>C. elegans</i>  | 462  | 8 |         | T | CaB                                               | IEA | ST                                                               | IEA |
| Q23643 | ZK856.8          | <i>C. elegans</i>  | 195  | 3 |         | T | CaB                                               | IEA | locomotion, ST                                                   | IEA |
| Q59DM1 | CaBP1            | <i>C. elegans</i>  | 679  | 8 |         | T | CaB                                               | IEA | ST                                                               | IEA |
| A8WU59 | CBR-EHS-1        | <i>C. briggsae</i> | 794  | 2 | EH      | P | CaB                                               | IEA |                                                                  |     |
| A8WJ38 | CBR-REPS-1       | <i>C. briggsae</i> | 252  | 1 | EH      | P | CaB                                               | IEA |                                                                  |     |
| A8XUA4 | CBR-RME-1        | <i>C. briggsae</i> | 611  | 1 | EH      | P | GTP binding, CaB,<br>GTPase activity              | IEA |                                                                  |     |
| A8WN16 | CBR-ITSN-1       | <i>C. briggsae</i> | 1099 | 2 | EH, SH3 | P | CaB                                               | IEA |                                                                  |     |
| Q9N5B7 | RME-1, isoform a | <i>C. briggsae</i> | 786  | 1 | EH      | T | receptor, CaB,<br>GTPase activity,<br>GTP binding | IEA |                                                                  |     |
| Q8WSP1 | RME-1, isoform e | <i>C. briggsae</i> | 613  | 1 | EH      | T | receptor, CaB,<br>GTPase activity,<br>GTP binding | IEA |                                                                  |     |
| Q86S80 | RME-1, isoform f | <i>C. briggsae</i> | 555  | 1 | EH      | T | receptor, CaB,<br>GTPase activity,<br>GTP binding | IEA |                                                                  |     |
| Q9N5B9 | RME-1, isoform c | <i>C. briggsae</i> | 589  | 1 | EH      | T | receptor, CaB,<br>GTPase activity,<br>GTP binding | IEA |                                                                  |     |
| Q9N5B8 | RME-1, isoform b | <i>C. briggsae</i> | 835  | 1 | EH      | T | receptor, CaB,<br>GTPase activity,<br>GTP binding | IEA | embryo development, endocytic<br>recycling, meiosis, endocytosis | IMP |

BTB Profile- Broad-Complex, Tramtrack and Bric a brac; SH2- Src homology 2; IMP- Inferred from Mutant Phenotype; CH- Calponin homology; SH3- Src homology3; IEA- Inferred from Electronic Annotation; EH- Eps15 Homology; PH- Pleckstrin homology; X- Phatidylinositol-specific phospholipase X; HP- Hypothetical Protein; Y- Phosphatidylinositol-specific phospholipase Y; Thr- Thyroglobulin; CaB- Calcium Binding; PLC- Phospholipase C; ST- Signal transduction; P- Predicted; T- Transcript; RME – Receptor Mediated Endocytosis; CaBP- Calcium Binding Protein; IPI- Inferred from Physical Interaction; PE- Protein Existence; PAT 10 - Paralyzed arrest at two-fold protein 10; NCS - Neuronal Calcium Sensor, MLC- Myosin Light chain; SPC- Spectrin; EF hand no.– Number of EF hands; Length- Number of amino acids; Biological function information was compiled from Uniprot and WORMBASE; All the functions of a protein deduced through one common technique have been put in a one row of the respective protein. If the technique differed for the particular function of the protein then it is kept in the next row of the respective protein.
