# Supplementary material for: In Silico Prediction and Analysis of Caenorhabditis EF-hand Containing Proteins
Source: PubMed Central journal article supplement (PMC3360750; doi:10.1371/journal.pone.0036770), 2012-05-25
Supplement: pone.0036770.s002.pdf [file pone.0036770.s002.pdf]

**Table S2.** Non EF-hand with calcium/metal binding motif proteins in *Caenorhabditis*

| UniProtID/gi | Predicted Name  | Organism           | Length | Other domain           | PE | Molecular Function                           | Source | Biological function                                                           | Source   |
|--------------|-----------------|--------------------|--------|------------------------|----|----------------------------------------------|--------|-------------------------------------------------------------------------------|----------|
| A8Y1Z6       | CBR-DYB-1       | <i>C. briggsae</i> | 622    | zf_zz                  | P  | CaB, ZnB                                     | IEA    |                                                                               |          |
| A8XM20       | Uncharacterized | <i>C. briggsae</i> | 1276   | ww, zz_zf, zz_c2h2     | P  | ZnB                                          | IEA    |                                                                               |          |
| Q9Y048       | Dystrobrevin-1  | <i>C. elegans</i>  | 590    | zf_zz, zz_zf           | T  | cytoplasm                                    | IEA    | synaptic specificity                                                          | IMP      |
|              |                 |                    |        |                        |    | glycoprotein                                 | IDA    | locomotion, muscle homeostasis, synaptic transmission, sarcomere organization | IMP, IGI |
| Q9TW65       | Dystrophin-1    | <i>C. elegans</i>  | 3674   | calponin homology      | T  | transporter                                  | IMP    | locomotory behaviour, synaptic transmission                                   | IMP      |
|              |                 |                    |        |                        |    | actin binding, ZnB                           | IEA    | homeostasis                                                                   | IMP      |
|              |                 |                    |        |                        |    |                                              |        | sarcomere organization                                                        | IGI      |
| A8XMK5       | CBR-PLL-1       | <i>C. briggsae</i> | 1083   | X, Y, C2               | P  | CaB, PLC, signal transducer                  | IEA    | ST, metabolic                                                                 | IEA      |
| A8XRA5       | CBR-PLC-1       | <i>C. briggsae</i> | 1917   | R, X, Y, C2, RA        | P  | CaB, PLC, signal transducer, exchange factor | IEA    | metabolic, ST                                                                 | IEA      |
| A8XTZ1       | CBR-PLC-3       | <i>C. briggsae</i> | 1308   | X, SH2, SH3, PH, Y, C2 | P  | PLC, signal transducer                       | IEA    | ST, phospholipid catabolic                                                    | IEA      |
| A8X232       | CBR-EGL-8       | <i>C. briggsae</i> | 1528   | X, Y, C2               | P  | PLC, CaB, signal transducer                  | IEA    | ST, lipid catabolic                                                           | IEA      |

|        |                                       |                   |      |                               |   |                                                       |     |                                                                                                                                                                       |     |
|--------|---------------------------------------|-------------------|------|-------------------------------|---|-------------------------------------------------------|-----|-----------------------------------------------------------------------------------------------------------------------------------------------------------------------|-----|
| Q9U6B9 | PLC beta                              | <i>C. elegans</i> | 1418 | X, Y, C2                      | T | PLC, CaB,<br>signal<br>transducer                     | IEA | ST, lipid catabolic                                                                                                                                                   | IEA |
| Q8IA75 | PLC                                   | <i>C. elegans</i> | 1075 | X, Y, C2                      | T | PLC, CaB,<br>signal<br>transducer                     | IEA | ST, lipid catabolic                                                                                                                                                   | IEA |
|        |                                       |                   |      |                               |   |                                                       |     | pronuclear migration                                                                                                                                                  | IMP |
| Q95X30 | Egg laying<br>defective protein-<br>8 | <i>C. elegans</i> | 1491 | X, Y, C2                      | T | CaB, PLC,<br>signal<br>transducer                     | IEA | ST, lipid metabolic                                                                                                                                                   | IEA |
| Q22070 | T01E8.3                               | <i>C. elegans</i> | 1350 | X, Y, C2 ,<br>PH, SH3,<br>SH2 | T | PLC                                                   | IEA | ST, phospholipid catabolic                                                                                                                                            | IEA |
|        |                                       |                   |      |                               |   | signal<br>transducer                                  | IEA | endocytosis, reproduction                                                                                                                                             | IMP |
| Q95X29 | Egg laying<br>defective protein-<br>8 | <i>C. elegans</i> | 1431 | X, Y, C2                      | T | PLC, CaB                                              | IEA | signaling pathway, embryo<br>development, insemination,<br>growth & locomotion<br>regulation, oviposition<br>regulation, oviposition<br>regulation, spicule insertion | IMP |
|        |                                       |                   |      |                               |   | signal<br>transducer                                  | IEA | ST, lipid metabolic                                                                                                                                                   | IEA |
| Q9TVI2 | PLC210                                | <i>C. elegans</i> | 1898 | X, Y, C2 ,<br>RA, R           | T | signal<br>transducer                                  | IEA | lipid metabolic, ST                                                                                                                                                   | IEA |
|        |                                       |                   |      |                               |   | CaB, PLC,<br>exchange factor                          | IEA | reproduction                                                                                                                                                          | IMP |
| Q7JM51 | F31B12.1b                             | <i>C. elegans</i> | 1868 | X, Y, C2 ,<br>RA, R           | T | signal<br>transducer,<br>CaB, PLC,<br>exchange factor | IEA | lipid metabolic, ST                                                                                                                                                   | IEA |

|        |                                       |                                  |      |                     |   |                                                       |     |                                                                    |     |
|--------|---------------------------------------|----------------------------------|------|---------------------|---|-------------------------------------------------------|-----|--------------------------------------------------------------------|-----|
| Q9XWB7 | Y75B12B.6                             | <i>C. elegans</i>                | 896  | X, Y                | T | CaB, PLC                                              | IEA | lipid metabolic, ST                                                | IEA |
| B3GWB0 | F31B12.1f                             | <i>C. elegans</i>                | 1886 | X, Y, C2 ,<br>RA, R | P | signal<br>transducer,<br>CaB, PLC,<br>exchange factor | IEA | lipid metabolic, ST                                                | IEA |
| B2D6L1 | F31B12.1d                             | <i>C. elegans</i>                | 1875 | X, Y, C2 ,<br>RA, R | P | signal<br>transducer,<br>CaB, PLC,<br>exchange factor | IEA | lipid metabolic, ST                                                | IEA |
| Q8IA76 | PLC like protein<br>1                 | <i>C. elegans</i>                | 1068 | X, Y, C2            | T | signal<br>transducer,<br>CaB, PLC                     | IEA | ST, lipid metabolic                                                | IEA |
| B2G4Y4 | Phosphoinositide<br>PLC-epsilon       | <i>C. elegans</i>                | 1878 | X, Y, C2 ,<br>RA, R | T | signal<br>transducer,<br>CaB, PLC,<br>exchange factor | IEA | lipid metabolic, ST                                                | IEA |
| Q6EZG7 | Egg laying<br>defective protein-<br>8 | <i>C. elegans</i>                | 592  | X                   | T | CaB, PLC                                              | IEA | ST, lipid metabolic                                                | IEA |
| A8Y2J4 | CBR-OST-1                             | <i>C. briggsae</i>               | 264  | KAZAL, Ost          | P | CaB                                                   | IEA | ST                                                                 | IEA |
| A8XBD1 | Uncharacterized                       | <i>C. briggsae</i>               | 275  | Thr                 | P | CaB                                                   | IEA | ST                                                                 | IEA |
| Q86GV1 | Uncharacterized                       | <i>C. elegans</i>                | 234  | Thr                 | T | CaB                                                   | IEA | ST                                                                 | IEA |
| O44466 | Uncharacterized                       | <i>C. elegans</i>                | 226  | Thr                 | T | CaB                                                   | IEA | ST                                                                 | IEA |
| P34714 | SPARC                                 | <i>C. elegans</i>                | 264  | KAZAL, Ost          | T | CaB                                                   | IEA | ST                                                                 | IEA |
|        |                                       |                                  |      |                     |   |                                                       |     | reproduction, growth<br>regulation, embryo & larval<br>development | IMP |
| Q4TTR2 | Osteonectin                           | <i>C. remanei</i><br>( <i>C.</i> | 106  |                     | T | CaB                                                   | IEA |                                                                    |     |

|        |            |                   |     |  |   |     |     |  |  |
|--------|------------|-------------------|-----|--|---|-----|-----|--|--|
|        |            | <i>vulgaris)</i>  |     |  |   |     |     |  |  |
| 002159 | HP T09B4.4 | <i>C. elegans</i> | 142 |  | T | CaB | IEA |  |  |

SH2- Src homology 2; IMP- Inferred from Mutant Phenotype; SH3- Src homology 3; IGI-Inferred from genetic interaction; PH- Pleckstrin homology; IEA- Inferred from Electronic Annotation; RA- Ras-associating; zf\_zz- Zinc finger, ZZ type; zz\_c2h2- Zinc finger, C2H2 type; X- Phosphatidylinositol- specific phospholipase X; Y- Phosphatidylinositol-specific phospholipase Y; R-Ras guanine-nucleotide exchange factors catalytic; Thr- Thyroglobulin; CaB- Calcium Binding; PLC- Phospholipase C; ZnB- zinc Binding; ST- Signal transduction; P- Predicted; T- Transcript; IDA -Inferred from Direct Assay; KAZAL- Kazal domain profile; Ost- Osteonectin domain; UniProtID/gi- UniProtID number/gi number. All the functions of a protein deduced through one common technique have been put in a one row of the respective protein. If the technique differed for the particular function of the protein then it is kept in the next row of the respective protein.
