# Supplementary material for: In Silico Prediction and Analysis of Caenorhabditis EF-hand Containing Proteins
Source: PubMed Central journal article supplement (PMC3360750; doi:10.1371/journal.pone.0036770), 2012-05-25
Supplement: pone.0036770.s003.pdf [file pone.0036770.s003.pdf]

**Table S3.** Nearest homologue of EF-hand Proteins in organism other than *Caenorhabditis* genus

| Organism           | Predicted Name              | Length | Uniprot id/gi | Homologue Source              | Homologous Protein               | Homologous Protein uniprot id | Homologous Protein length | % Identity |
|--------------------|-----------------------------|--------|---------------|-------------------------------|----------------------------------|-------------------------------|---------------------------|------------|
| <i>C. elegans</i>  | C18E9.1                     | 171    | Q18092        | <i>Ascaris suum</i>           | CaM-like protein                 | F1L911                        | 169                       | 78%        |
| <i>C. brenneri</i> | HP CAEBREN_11606            | 171    | G0NP24        | <i>Ascaris suum</i>           | CaM-like protein                 | F1L911                        | 169                       | 79%        |
| <i>C. remanei</i>  | CBR-CAL-2                   | 171    | E3LG34        | <i>Ascaris suum</i>           | CaM-like protein                 | F1L911                        | 169                       | 78%        |
| <i>C. remanei</i>  | CRE-CAL-1                   | 198    | E3LNK3        | <i>Loa loa</i>                | CaM-like protein                 | E1FVS4                        | 167                       | 92%        |
| <i>C. elegans</i>  | CAL-1                       | 161    | P04630        | <i>Loa loa</i>                | CaM-like protein                 | E1FVS4                        | 167                       | 92%        |
| <i>C. brenneri</i> | HP CAEBREN_30810            | 168    | G0MP03        | <i>Loa loa</i>                | CaM-like protein                 | E1FVS4                        | 167                       | 89%        |
| <i>C. briggsae</i> | CBR-CAL-1                   | 180    | 268557584     | <i>Loa loa</i>                | CaM-like protein                 | E1FVS7                        | 167                       | 89%        |
| <i>C. briggsae</i> | CBR-CAL-3                   | 164    | 268552973     | <i>Ascaris suum</i>           | CaM-like protein                 | F1LF35                        | 176                       | 71%        |
| <i>C. remanei</i>  | CRE-CAL-3                   | 231    | E3M5U3        | <i>Ascaris suum</i>           | CaM-like protein                 | F1LF35                        | 176                       | 71%        |
| <i>C. brenneri</i> | HP CAEBREN_12026            | 181    | G0P5R9        | <i>Ascaris suum</i>           | CaM-like protein                 | F1LF35                        | 176                       | 71%        |
| <i>C. briggsae</i> | CBR-CAL-3                   | 233    | A8XBN2        | <i>Ascaris suum</i>           | CaM-like protein                 | F1LF35                        | 176                       | 71%        |
| <i>C. remanei</i>  | Uncharacterized             | 182    | E3M5L0        | <i>Loa loa</i>                | Putative uncharacterized protein | E1G7X3                        | 299                       | 80%        |
| <i>C. remanei</i>  | HP CRE_15028                | 290    | E3NKA0        | <i>Loa loa</i>                | Putative uncharacterized protein | E1G7X3                        | 299                       | 74%        |
| <i>C. elegans</i>  | CAL-4                       | 182    | O18058        | <i>Loa loa</i>                | Uncharacterized protein          | E1G7X3                        | 299                       | 81%        |
| <i>C. elegans</i>  | T07G12.1b                   | 208    | C6KRM4        | <i>Loa loa</i>                | Putative uncharacterized protein | E1G7X3                        | 299                       | 75%        |
| <i>C. elegans</i>  | T07G12.1a                   | 236    | C6KRM3        | <i>Loa loa</i>                | Putative uncharacterized protein | E1G7X3                        | 299                       | 74%        |
| <i>C. elegans</i>  | CaM-related genes protein-3 | 167    | Q94288        | <i>Ascaris suum</i>           | CaM-like protein                 | F1LF35                        | 176                       | 71%        |
| <i>C. elegans</i>  | CAL-3                       | 234    | 115534350     | <i>Ascaris suum</i>           | CaM-like protein                 | F1LF35                        | 176                       | 71%        |
| <i>C. brenneri</i> | HP CAEBREN_06721            | 201    | 341889270     | <i>Dictyocaulus viviparus</i> | Putative CaM isoform a           | Q6QGZ0                        | 210                       | 82%        |
| <i>C. remanei</i>  | HP CRE_27132                | 201    | E3LNL5        | <i>Dictyocaulus viviparus</i> | Putative CaM isoform a           | Q6QGZ1                        | 210                       | 82%        |
| <i>C. elegans</i>  | HP E02A10.3                 | 202    | P90802        | <i>Dictyocaulus viviparus</i> | Putative CaM                     | Q6QGZ1                        | 210                       | 82%        |

|                         |                     |     |           |                                    |                                                       |        |     |     |
|-------------------------|---------------------|-----|-----------|------------------------------------|-------------------------------------------------------|--------|-----|-----|
|                         |                     |     |           |                                    | isoform a                                             |        |     |     |
| <i>C. briggsae</i>      | HP CBG23534         | 201 | A8Y3P8    | <i>D. viviparus</i>                | CaM isoform a                                         | Q6QGZ1 | 210 | 82% |
| <i>C. elegans</i>       | tnc-2               | 160 | Q09665    | <i>Ascaris suum</i>                | Troponin C isoform 2                                  | F1LF05 | 162 | 89% |
| <i>C. briggsae</i>      | CBR-TNC-2           | 160 | A8WSS9    | <i>Ascaris suum</i>                | Troponin C isoform 2                                  | F1LF05 | 162 | 90% |
| <i>C. elegans</i>       | HP B0563.7          | 229 | Q11083    | <i>Ascaris suum</i>                | CaBP                                                  | F1LB89 | 216 | 47% |
| <i>C. elegans</i>       | HP Y73B3A.12        | 116 | Q95XF6    | <i>Dugesia japonica</i>            | CaM                                                   | Q5H765 | 149 | 79% |
| <i>C. remanei</i>       | HP CRE_14767        | 230 | E3MRT8    | <i>Ascaris suum</i>                | CaBP                                                  | F1LB89 | 216 | 43% |
| <i>C. briggsae</i>      | HP CBG00175         | 230 | 268580583 | <i>Ascaris suum</i>                | CaBP                                                  | F1LB89 | 216 | 46% |
| <i>C. briggsae</i>      | HP CBG02410         | 145 | 268531200 | <i>Trichinella spiralis</i>        | EF hand domain containing protein                     | E5SQ18 | 239 | 46% |
| <i>C. elegans</i>       | HP F12A10.5         | 145 | Q09980    | <i>Trichinella spiralis</i>        | EF hand domain containing protein                     | E5SQ18 | 239 | 46% |
| <i>C. remanei</i>       | HP CRE_11951        | 145 | E3M4N3    | <i>Monodelphis domestica</i>       | Putative uncharacterized protein                      | F7D7Y  | 149 | 45% |
| <i>C. briggsae AF16</i> | HP CBG_00175        | 172 | A8WME8    | <i>Ascaris suum</i>                | CaBP                                                  | F1LB89 | 216 | 45% |
| <i>C. briggsae AF16</i> | HP CBG_02410        | 150 | A8WUD8    | <i>Loa loa</i>                     | Putative uncharacterized protein                      | E1FKG3 | 154 | 44% |
| <i>C. brenneri</i>      | Troponin C          | 150 | B3GEK4    | <i>Loa loa</i>                     | Putative uncharacterized protein                      | E1FUX2 | 163 | 94% |
| <i>C. remanei</i>       | CRE-PAT-10          | 200 | E3MX54    | <i>Onchocerca volvulus</i>         | EF-hand family protein                                | C7DRP1 | 161 | 93% |
| <i>C. briggsae AF16</i> | HP CBG_11013        | 201 | A8XC16    | <i>Onchocerca volvulus</i>         | EF-hand family protein                                | C7DRP1 | 161 | 93% |
| <i>C. elegans</i>       | Vitellogenin-linked | 156 | Q18136    | <i>Angiostrongylus cantonensis</i> | Putative Vitellogenin-linked transcript family member | C7BVL8 | 159 | 83% |

|                    |                  |     |           |                                    |                                                       |        |     |     |
|--------------------|------------------|-----|-----------|------------------------------------|-------------------------------------------------------|--------|-----|-----|
| <i>C. brenneri</i> | CBN-CAL-5        | 156 | G0M8G3    | <i>Angiostrongylus cantonensis</i> | Putative Vitellogenin-linked transcript family member | C7BVL8 | 159 | 83% |
| <i>C. brenneri</i> | HP CAEBREN_26130 | 164 | G0N500    | <i>Ascaris suum</i>                | CaM                                                   | F1LFS6 | 147 | 63% |
| <i>C. remanei</i>  | CRE-CAL-5        | 156 | E3LE72    | <i>Angiostrongylus cantonensis</i> | Putative Vitellogenin-linked Transcript family member | C7BVL8 | 159 | 84% |
| <i>C. elegans</i>  | K03A1.4 a        | 184 | Q21165    | <i>Ascaris suum</i>                | CaM                                                   | F1LFS6 | 147 | 63% |
| <i>C. briggsae</i> | CBR-UVT-2        | 156 | A8XK99    | <i>Angiostrongylus cantonensis</i> | Putative Vitellogenin-linked transcript family member | C7BVL8 | 159 | 84% |
| <i>C. remanei</i>  | HP CRE_00078     | 199 | E3LD20    | <i>Ascaris suum</i>                | CaM                                                   | F1LFS6 | 147 | 63% |
| <i>C. briggsae</i> | HP CBG11013      | 243 | 268580069 | <i>Ascaris suum</i>                | CaM                                                   | F1LFS6 | 147 | 63% |
| <i>C. elegans</i>  | HP K03A1.4       | 264 | 115533480 | <i>Ascaris suum</i>                | CaM                                                   | F1LFS6 | 147 | 61% |
| <i>C. brenneri</i> | HP CAEBREN_16765 | 181 | G0MQV0    | <i>Ascaris suum</i>                | CaM-like protein                                      | F1LF35 | 176 | 43% |
| <i>C. elegans</i>  | mlc-4            | 172 | Q09510    | <i>Ascaris suum</i>                | Myosin regulatory light chain                         | F1KZM0 | 171 | 85% |
| <i>C. briggsae</i> | CBR-MLC-4        | 172 | A8X9U2    | <i>Ascaris suum</i>                | Myosin regulatory light chain                         | F1KZM0 | 171 | 87% |
| <i>C. brenneri</i> | HP CAEBREN_07889 | 172 | G0MKR0    | <i>Ascaris suum</i>                | Myosin regulatory light chain                         | F1KZM0 | 171 | 87% |
| <i>C. remanei</i>  | HP CBG18252      | 142 | E3LYJ5    | <i>Loa loa</i>                     | Myosin                                                | E1G510 | 147 | 78% |
| <i>C. elegans</i>  | HP T12D8.6       | 142 | Q9XVI9    | <i>Loa loa</i>                     | Myosin                                                | E1G510 | 147 | 78% |
| <i>C. brenneri</i> | HP CAEBREN_10686 | 163 | G0PGC7    | <i>Loa loa</i>                     | Protein phosphatase-3                                 | E1FR52 | 170 | 92% |

|                         |                   |     |           |                                 |                                |        |     |     |
|-------------------------|-------------------|-----|-----------|---------------------------------|--------------------------------|--------|-----|-----|
| <i>C. elegans</i>       | cnb-1             | 171 | Q20804    | <i>Ascaris suum</i>             | Calcineurin subunit B type 2   | F1L7X3 | 171 | 90% |
| <i>C. remanei</i>       | CRE-CNB-1         | 171 | E3MQD1    | <i>Ascaris suum</i>             | Calcineurin subunit B type 2   | F1L7X3 | 171 | 91% |
| <i>C. remanei</i>       | CRE-MLC-4         | 188 | E3LTC7    | <i>Ascaris suum</i>             | Myosin regulatory light        | F1KZM0 | 171 | 79% |
| <i>C. elegans</i>       | HP K04C1.4        | 143 | Q21201    | <i>Toxocara canis</i>           | TcH500 protein                 | P91814 | 148 | 49% |
| <i>C. brenneri</i>      | HP CAEBREN_02413  | 156 | G0ML63    | <i>Loa loa</i>                  | Myosin                         | E1G510 | 147 | 71% |
| <i>C. briggsae</i>      | HP CBG14543       | 159 | A8XK57    | <i>Ascaris suum</i>             | CaM                            | F1LDU1 | 119 | 76% |
| <i>C. brenneri</i>      | HP Cbre_JD16.001  | 152 | B6VBN6    | <i>Setaria digitata</i>         | Alkali MLC                     | C7DXW9 | 149 | 84% |
| <i>C. brenneri</i>      | CBN-MLC-3         | 152 | G0MPK8    | <i>Setaria digitata</i>         | Alkali MLC                     | C7DXW9 | 149 | 84% |
| <i>C. remanei</i>       | CRE-MLC-3 protein | 153 | E3LZ12    | <i>Setaria digitata</i>         | Alkali MLC                     | C7DXW9 | 149 | 84% |
| <i>C. brenneri</i>      | MLC-3             | 152 | B3GD70    | <i>Setaria digitata</i>         | Alkali MLC                     | C7DXW9 | 149 | 84% |
| <i>C. briggsae</i>      | CBR-MLC-3         | 153 | A8WJV7    | <i>Setaria digitata</i>         | Alkali MLC                     | C7DXW9 | 149 | 84% |
| <i>C. elegans</i>       | MLC-3             | 153 | P53014    | <i>Setaria digitata</i>         | Alkali MLC                     | C7DXW9 | 149 | 81% |
| <i>C. briggsae AF16</i> | HP CBG_19361      | 179 | A8XVF9    | <i>Dictyostelium discoideum</i> | CaM                            | P02599 | 152 | 34% |
| <i>C. elegans</i>       | HP F43C9.2        | 159 | Q20358    | <i>Ascaris suum</i>             | CaM                            | F1LDU1 | 119 | 75% |
| <i>C. brenneri</i>      | HP CAEBREN_15606  | 159 | G0M8A6    | <i>Ascaris suum</i>             | CaM                            | F1LDU1 | 119 | 76% |
| <i>C. remanei</i>       | HP CRE_00789      | 159 | E3LEB5    | <i>Ascaris suum</i>             | CaM                            | F1LDU1 | 119 | 76% |
| <i>C. briggsae</i>      | HP CBG19361       | 137 | 268559254 | <i>Dictyostelium discoideum</i> | CaM                            | P02599 | 152 | 34% |
| <i>C. brenneri</i>      | HP CAEBREN_20342  | 179 | G0NPN1    | <i>Dictyostelium discoideum</i> | CaM                            | P02599 | 152 | 34% |
| <i>C. remanei</i>       | HP CRE_22883      | 179 | E3MHC8    | <i>Dictyostelium discoideum</i> | CaM                            | P02599 | 152 | 32% |
| <i>C. briggsae</i>      | HP CBG18268       | 147 | A8XSA6    | <i>Brugia malayi</i>            | Myosin putative                | A8PB51 | 151 | 42% |
| <i>C. remanei</i>       | HP CRE_04650      | 153 | E3LYH5    | <i>Caligus rogercresseyi</i>    | Myosin-2 essential light chain | C1BRM7 | 150 | 43% |
| <i>C. brenneri</i>      | HP CAEBREN_22778  | 153 | G0ML46    | <i>Brugia malayi</i>            | Myosin putative                | A8PB51 | 151 | 40% |
| <i>C. elegans</i>       | F40F9.8           | 179 | Q20238    | <i>Dictyostelium discoideum</i> | CaM                            | P02599 | 152 | 32% |
| <i>C. elegans</i>       | HP K08E3.10       | 153 | Q69Z12    | <i>Ascaris suum</i>             | Myosin-2                       | F1LFN9 | 149 | 40% |

|                    |                  |      |           |                                 |                                  |        |      |     |
|--------------------|------------------|------|-----------|---------------------------------|----------------------------------|--------|------|-----|
|                    |                  |      |           |                                 | essential light chain            |        |      |     |
| <i>C. elegans</i>  | HP F40F9.8       | 137  | 17560804  | <i>Dictyostelium discoideum</i> | CaM                              | P02599 | 152  | 33% |
| <i>C. remanei</i>  | HP CRE_13655     | 172  | E3N7H9    | <i>Loa loa</i>                  | Programmed cell death protein 6  | E1GGF7 | 172  | 76% |
| <i>C. elegans</i>  | HP M04F3.4       | 157  | Q95Y96    | <i>Loa loa</i>                  | Programmed cell death protein 6  | E1GGF7 | 172  | 76% |
| <i>C. elegans</i>  | M04F3.4 a        | 172  | 351050110 | <i>Loa loa</i>                  | Programmed cell death protein 6  | E1GGF7 | 172  | 76% |
| <i>C. elegans</i>  | HP F59D6.7       | 213  | 17561748  | <i>Ascaris suum</i>             | CaBP p22                         | F1KTJ1 | 184  | 69% |
| <i>C. elegans</i>  | bath-25          | 364  | Q9TZM5    |                                 |                                  |        |      |     |
| <i>C. elegans</i>  | F59D6.7          | 195  | O16343    | <i>Ascaris suum</i>             | CaBP p22                         | F1KTJ1 | 184  | 66% |
| <i>C. briggsae</i> | HP CBG15199      | 233  | A8XLP7    | <i>Loa loa</i>                  | Uncharacterized                  | E1G817 | 184  | 30% |
| <i>C. remanei</i>  | HP CRE_16173     | 235  | E3MSP5    | <i>Loa loa</i>                  | Putative uncharacterized protein | E1G817 | 184  | 29% |
| <i>C. briggsae</i> | HP CBG03955      | 173  | A8WVU5    | <i>Loa loa</i>                  | Programmed cell death protein 6  | E1GGF7 | 172  | 77% |
| <i>C. remanei</i>  | HP CRE_29149     | 186  | E3N4M5    | <i>Ascaris suum</i>             | Myosin regulatory light chain    | F1KZM0 | 171  | 51% |
| <i>C. brenneri</i> | HP CAEBREN_02194 | 189  | G0N5F2    | <i>Ascaris suum</i>             | CaBP                             | F1LEH3 | 192  | 44% |
| <i>C. remanei</i>  | spectrin         | 171  | A8VT39    | <i>Loa loa</i>                  | Spna2 protein                    | E1G0A3 | 474  | 94% |
| <i>C. remanei</i>  | HP CRE_03312     | 170  | E3MML2    | <i>Ascaris suum</i>             | Myosin regulatory light chain 1  | F1L8H3 | 170  | 88% |
| <i>C. elegans</i>  | spc-1            | 2427 | Q21408    | <i>Ascaris suum</i>             | Spectrin alpha chain             | F1KPR0 | 2422 | 80% |
| <i>C. remanei</i>  | CRE-SPC-1        | 2370 | E3LCP1    | <i>Ascaris suum</i>             | Spectrin alpha chain             | F1KPR0 | 2422 | 76% |
| <i>C. remanei</i>  | CRE-ATN-1        | 921  | E3LNI9    | <i>Ascaris suum</i>             | Alpha-actinin sarcomeric         | F1KR95 | 901  | 79% |

|                    |                   |      |           |                                     |                                            |        |      |      |
|--------------------|-------------------|------|-----------|-------------------------------------|--------------------------------------------|--------|------|------|
| <i>C. briggsae</i> | CBR-SPC-1         | 2427 | 268578695 | <i>Brugia malayi</i>                | Spectrin alpha chain putative              | A8PJH9 | 2423 | 79%  |
| <i>C. brenneri</i> | CBN-SPC-1         | 2427 | 341874657 | <i>Ascaris suum</i>                 | Spectrin alpha chain                       | F1KPR0 | 2422 | 80%  |
| <i>C. briggsae</i> | CBR-MLC-2.2       | 170  | G2J6D1    | <i>Ascaris suum</i>                 | Myosin regulatory light chain 1            | F1L8H3 | 170  | 88%  |
| <i>C. briggsae</i> | CBR-NCS-2         | 190  | A8WWQ4    | <i>Ascaris suum</i>                 | NCS-2                                      | F1LFQ0 | 190  | 98%  |
| <i>C. briggsae</i> | CBR-NCS-3         | 174  | A8X5Q4    | <i>Ascaris suum</i>                 | NCS-1                                      | F1L8J7 | 208  | 66%  |
| <i>C. briggsae</i> | Uncharacterized   | 196  | A8X9R8    | <i>Ascaris suum</i>                 | CaBP p22                                   | F1KTJ1 | 184  | 57%  |
| <i>C. briggsae</i> | CBR-PAT-10        | 161  | A8XBR6    | <i>Onchocerca volvulus</i>          | EF-hand family protein                     | C7DRP1 | 161  | 93%  |
| <i>C. briggsae</i> | CBR-CMD-1         | 149  | A8WPJ8    | <i>Dugesia japonica</i>             | CaM                                        | Q5H765 | 149  | 100% |
| <i>C. briggsae</i> | Uncharacterized   | 224  | A8XQM5    | <i>Loa loa</i>                      | Putative uncharacterized protein           | E1GMR4 | 179  | 44%  |
| <i>C. briggsae</i> | Uncharacterized   | 199  | A8WYJ2    | <i>Ascaris suum</i>                 | CaBP p22                                   | F1KTJ1 | 184  | 66%  |
| <i>C. briggsae</i> | Uncharacterized   | 456  | A8X2U3    | <i>Ascaris suum</i>                 | EF-hand domain-containing family member A2 | F1L0Z4 | 439  | 57%  |
| <i>C. briggsae</i> | Uncharacterized   | 81   | A8XEQ0    | <i>Nicotiana tabacum</i>            | CaM NtCaM13                                | Q94IG4 | 150  | 38%  |
| <i>C. brenneri</i> | Troponin C        | 37   | B3GD87    | <i>Anisakis simplex</i>             | Troponin-like protein                      | Q9U3U5 | 161  | 89%  |
| <i>C. elegans</i>  | Uncharacterized   | 176  | D1P8J5    | <i>Trypanosoma brucei gambiense</i> | CaMputative                                | D0A9H8 | 148  | 42%  |
| <i>C. elegans</i>  | Uncharacterized   | 196  | Q9N2Y1    | <i>Ascaris suum</i>                 | CaBP p22                                   | F1KTJ1 | 184  | 55%  |
| <i>C. elegans</i>  | Protein F21A10.1a | 224  | Q9XXN7    | <i>Loa loa</i>                      | Putative uncharacterized protein           | E1GMR4 | 179  | 43%  |
| <i>C. elegans</i>  | Protein Y48B6A.6a | 687  | Q9U2A6    | <i>Loa loa</i>                      | Putative uncharacterized protein           | E1FQF8 | 210  | 66%  |
| <i>C. elegans</i>  | Uncharacterized   | 97   | Q3V5K4    | <i>Zea mays</i>                     | Putative uncharacterized protein           | C4JB3  | 183  | 39%  |

|                    |                          |     |        |                             |                                                                |        |     |     |
|--------------------|--------------------------|-----|--------|-----------------------------|----------------------------------------------------------------|--------|-----|-----|
| <i>C. elegans</i>  | Protein Y48B6A.6c        | 179 | A8XMZ5 | <i>Loa loa</i>              | Uncharacterized protein                                        | E1FQF8 | 210 | 68% |
| <i>C. elegans</i>  | Protein Y48B6A.6b        | 203 | Q8I0Z7 | <i>Loa loa</i>              | Putative uncharacterized protein                               | E1FQF8 | 210 | 66% |
| <i>C. elegans</i>  | Uncharacterized          | 43  | Q2L6W4 | <i>Ascaris suum</i>         | CaM                                                            | F1LFS6 | 147 | 60% |
| <i>C. elegans</i>  | Protein C56A3.6a         | 477 | Q18874 | <i>Ascaris suum</i>         | EF-hand domain-containing family member A2                     | F1L0Z4 | 439 | 52% |
| <i>C. elegans</i>  | NCS family protein-3     | 199 | Q95ZR9 | <i>Ascaris suum</i>         | NCS-1                                                          | F1L8J7 | 208 | 78% |
| <i>C. elegans</i>  | Protein F21A10.1b        | 145 | A6PVB9 | <i>Loa loa</i>              | Putative uncharacterized protein                               | E1GMR4 | 179 | 44% |
| <i>C. elegans</i>  | Putative uncharacterized | 236 | O76670 | <i>Loa loa</i>              | Putative uncharacterized protein                               | E1G817 | 184 | 31% |
| <i>C. briggsae</i> | CAEBR CBR-ATN-1          | 894 | A8Y3R8 | <i>Ascaris suum</i>         | Alpha-actinin sarcomeric                                       | F1KR95 | 901 | 81% |
| <i>C. elegans</i>  | CAEEL Alpha-Actinin      | 910 | Q9TXC0 | <i>Ascaris suum</i>         | Alpha-actinin sarcomeric                                       | F1KR95 | 901 | 79% |
| <i>C. elegans</i>  | CAEEL                    | 894 | Q9XVU8 | <i>Ascaris suum</i>         | Alpha-actinin sarcomeric                                       | F1KR95 | 901 | 81% |
| <i>C. elegans</i>  | CAEEL                    | 920 | Q23158 | <i>Ascaris suum</i>         | Alpha-actinin sarcomeric                                       | F1KR95 | 901 | 79% |
| <i>C. briggsae</i> | CAEBR CBR-PLC-4          | 752 | A8X1E0 | <i>Loa loa</i>              | Phosphatidylinositol-specific PLC                              | E1FPG2 | 731 | 51% |
| <i>C. elegans</i>  | CAEEL PLC                | 751 | Q21754 | <i>Loa loa</i>              | Phosphatidylinositol-specific PLC                              | E1FPG2 | 731 | 51% |
| <i>C. briggsae</i> | CAEBR Uncharacterized    | 261 | A8Y4A7 | <i>Trichinella spiralis</i> | Putative thyroglobulin type-1 repeat-containing domain protein | E5S6P2 | 490 | 37% |
| <i>C. briggsae</i> | CAEBR Uncharacterized    | 143 | A8WWN1 | <i>Loa loa</i>              | Calcium and integrin binding                                   | E1G3G4 | 201 | 86% |



|                    |                                |      |        |                             |                                                                |        |       |     |
|--------------------|--------------------------------|------|--------|-----------------------------|----------------------------------------------------------------|--------|-------|-----|
|                    |                                |      |        |                             | family member 2                                                |        |       |     |
| <i>C. briggsae</i> | CAEBR Uncharacterized          | 195  | A8X8U9 | <i>Ascaris suum</i>         | CaBP p22                                                       | F1KTJ1 | 184   | 73% |
| <i>C. briggsae</i> | CAEBR CBR-CBN-1                | 710  | A8X3T5 | <i>Onchocerca volvulus</i>  | CBP-1                                                          | Q9NJD9 | 542   | 58% |
| <i>C. elegans</i>  | CAEEL CaBP homologue protein 1 | 585  | Q9TZ48 | <i>Onchocerca volvulus</i>  | CBP-1                                                          | Q9NJD9 | 542   | 59% |
| <i>C. elegans</i>  | CAEEL Protein                  | 260  | Q22157 | <i>Trichinella spiralis</i> | Putative thyroglobulin type-1 repeat-containing domain protein | E5S6P2 | 490   | 39% |
| <i>C. elegans</i>  | CAEEL CaBP                     | 482  | Q9TZ47 | <i>Onchocerca volvulus</i>  | CBP-1                                                          | Q9NJD9 | 542   | 60% |
| <i>C. elegans</i>  | CAEEL CaBP                     | 462  | Q86S18 | <i>O. volvulus</i>          | CBP-1                                                          | Q9NJD9 | 542   | 61% |
| <i>C. elegans</i>  | CAEEL Protein                  | 195  | Q23643 | <i>Ascaris suum</i>         | CaBP p22                                                       | F1KTJ1 | 184   | 73% |
| <i>C. elegans</i>  | CAEEL CaBP                     | 679  | Q59DM1 | <i>Onchocerca volvulus</i>  | CBP-1                                                          | Q9NJD9 | 542   | 59% |
| <i>C. briggsae</i> | CBR-EHS-1                      | 794  | A8WU59 | <i>Ascaris suum</i>         | Epidermal growth factor receptor substrate                     | F1KWZ5 | 752   | 40% |
| <i>C. briggsae</i> | CBR-REPS-1                     | 252  | A8WJ38 | <i>Loa loa</i>              | Putative uncharacterized protein                               | E1FLG4 | 651   | 69% |
| <i>C. briggsae</i> | CBR-RME-1                      | 611  | A8XUA4 | <i>Ascaris suum</i>         | EH domain-containing protein 1                                 | F1L014 | 552   | 85% |
| <i>C. briggsae</i> | CBR-ITSN-1                     | 1099 | A8WN16 | <i>Ascaris suum</i>         | Intersectin-1                                                  | F1KQL1 | 1,619 | 38% |
| <i>C. elegans</i>  | CAEEL RME                      | 786  | Q9N5B7 | <i>Ascaris suum</i>         | EH domain-containing protein 1                                 | F1L014 | 552   | 85% |
| <i>C. elegans</i>  | CAEEL RME                      | 613  | Q8WSP1 | <i>Ascaris suum</i>         | EH domain-containing protein 1                                 | F1L014 | 552   | 85% |
| <i>C. elegans</i>  | CAEEL RME                      | 555  | Q86S80 | <i>Ascaris suum</i>         | EH domain-containing protein 1                                 | F1L014 | 552   | 85% |

|                    |             |      |        |                     |                                            |        |       |     |
|--------------------|-------------|------|--------|---------------------|--------------------------------------------|--------|-------|-----|
| <i>C. elegans</i>  | CAEEL RME   | 589  | Q9N5B9 | <i>Ascaris suum</i> | EH domain-containing protein 1             | F1L014 | 552   | 85% |
| <i>C. elegans</i>  | CAEEL RME   | 835  | Q9N5B8 | <i>Ascaris suum</i> | EH domain-containing protein 1             | F1L014 | 552   | 85% |
| <i>C. elegans</i>  | CAEEL       | 1085 | Q9U2T9 | <i>Ascaris suum</i> | Intersectin-1                              | F1KQL1 | 1,619 | 39% |
| <i>C. elegans</i>  | CAEEL RME   | 576  | Q966F0 | <i>Ascaris suum</i> | EH domain-containing protein 1             | F1L014 | 552   | 84% |
| <i>C. elegans</i>  | CAEEL EHS-1 | 796  | Q9BIF4 | <i>Ascaris suum</i> | Epidermal growth factor receptor substrate | F1KWZ5 | 752   | 39% |
| <i>C. elegans</i>  | CAEEL       | 410  | Q8MYM6 | <i>Loa loa</i>      | Putative uncharacterized protein           | E1FLG4 | 651   | 35% |
| <i>C. briggsae</i> | CBR-SPC-1   | 2467 | A8XJE3 | <i>Ascaris suum</i> | Spectrin alpha chain                       | F1KPR0 | 2422  | 79% |

CaBP- Calcium Binding Protein; CaM – Calmodulin; RME - Receptor Mediated Endocytosis; NCS – Neuronal Calcium Sensor.
