# Supplementary material for: In Silico Prediction and Analysis of Caenorhabditis EF-hand Containing Proteins
Source: PubMed Central journal article supplement (PMC3360750; doi:10.1371/journal.pone.0036770), 2012-05-25
Supplement: pone.0036770.s004.pdf [file pone.0036770.s004.pdf]

**Table S4.** Calcium binding constant of EF-hand CaBP

| <b>UniprotID/gi</b> | <b>Predicted Name</b> | <b>EF-hands</b> | <b>EF-hand Sequence</b> | <b>Ca<sup>2+</sup> binding affinity</b> |
|---------------------|-----------------------|-----------------|-------------------------|-----------------------------------------|
| Q18092_1            | C18E9.1               | 4               | DKDGNGSISKE             | strong                                  |
| Q18092_2            |                       |                 | DIDGSGTIDFGE            | strong                                  |
| Q18092_3            |                       |                 | DRDGNGFITADE            | strong                                  |
| Q18092_4            |                       |                 | DIDGDGQIDYEE            | strong                                  |
| G0NP24_1            | HP CAEBREN_11606      | 4               | DKDGNGSISKE             | strong                                  |
| G0NP24_2            |                       |                 | DIDGSGTIDFGE            | strong                                  |
| G0NP24_3            |                       |                 | DRDGNGFITADE            | strong                                  |
| G0NP24_4            |                       |                 | DIDGDGQIDYEE            | strong                                  |
| E3LG34_1            | CBR-CAL-2             | 4               | DKDGNGSISKE             | strong                                  |
| E3LG34_2            |                       |                 | DIDGSGTIDFGE            | strong                                  |
| E3LG34_3            |                       |                 | DRDGNGFITADE            | strong                                  |
| E3LG34_4            |                       |                 | DIDGDGQIDYEE            | strong                                  |
| E3LNK3_1            | CRE-CAL-1             | 4               | DKDGNGTISTKE            | strong                                  |
| E3LNK3_2            |                       |                 | DIDGNGQIEFPE            | strong                                  |
| E3LNK3_3            |                       |                 | DKDGNGVITAE             | strong                                  |
| E3LNK3_4            |                       |                 | DVDGDGEIDYEE            | strong                                  |
| P04630_1            | CAL-1                 | 4               | DKDGNGTISTKE            | strong                                  |
| P04630_2            |                       |                 | DIDGNGQIEFPE            | strong                                  |
| P04630_3            |                       |                 | DKDGNGVITAE             | strong                                  |
| P04630_4            |                       |                 | DVDGDGEIDYEE            | strong                                  |
| G0MP03_1            | HP CAEBREN_30810      | 4               | DKDGNGTISTKE            | strong                                  |
| G0MP03_2            |                       |                 | DIDGNGQIEFPE            | strong                                  |
| G0MP03_3            |                       |                 | DKDGNGVITAE             | strong                                  |
| G0MP03_4            |                       |                 | DVDGDGEIDYEE            | strong                                  |
| 268557584_1         | CBR-CAL-1             | 4               | DKDGNGTISTKE            | strong                                  |
| 268557584_2         |                       |                 | DIDGNGQIEFPE            | strong                                  |
| 268557584_3         |                       |                 | DKDGNGVITAE             | strong                                  |
| 268557584_4         |                       |                 | DVDGDGEIDYEE            | strong                                  |
| 268552973_1         | CBR-CAL-3             | 4               | DKDGNGTISIKE            | strong                                  |
| 268552973_2         |                       |                 | DLDGNGQVEFPE            | strong                                  |
| 268552973_3         |                       |                 | DRDGNGVITANE            | strong                                  |
| 268552973_4         |                       |                 | DCDGNGEIDYEE            | strong                                  |
| E3M5U3_1            | CRE-CAL-3 protein     | 4               | DKDGNGTISIKE            | strong                                  |
| E3M5U3_2            |                       |                 | DLDGNGQVEFPE            | strong                                  |
| E3M5U3_3            |                       |                 | DRDGNGVITANE            | strong                                  |
| E3M5U3_4            |                       |                 | DCDGNGEIDYEE            | strong                                  |
| G0P5R9_1            | HP CAEBREN_12026      | 4               | DKDGNGTISIKE            | strong                                  |
| G0P5R9_2            |                       |                 | DLDGNGQVEFPE            | strong                                  |
| G0P5R9_3            |                       |                 | DRDGNGVITANE            | strong                                  |
| G0P5R9_4            |                       |                 | DCDGNGEIDYEE            | strong                                  |
| A8XBN2_1            | CBR-CAL-3             | 4               | DKDGNGTISIKE            | strong                                  |

|             |                                |   |              |        |
|-------------|--------------------------------|---|--------------|--------|
| A8XBN2_2    |                                |   | DLDGNGQVEFPE | strong |
| A8XBN2_3    |                                |   | DRDGNGVITANE | strong |
| A8XBN2_4    |                                |   | DCDGNGEIDYEE | strong |
| E3M5L0_1    | CBR-CAL-4                      | 4 | DKDGNNTMNIKE | strong |
| E3M5L0_2    |                                |   | DVDGNGKIDFGE | Strong |
| E3M5L0_3    |                                |   | DKDGNGYITAQ  | Strong |
| E3NKA0_1    | HP CRE_15028                   | 3 | DKDGNNTMNIKE | strong |
| E3NKA0_2    |                                |   | DVDGNGKIDFGE | strong |
| E3NKA0_3    |                                |   | DKDGNGYITAE  | strong |
| O18058_1    | CAL-4                          | 3 | DKDGNNTMNIKE | strong |
| O18058_2    |                                |   | DVDGNGKIDFGE | strong |
| O18058_3    |                                |   | DKDGNGYITAE  | strong |
| C6KRM4_1    | T07G12.1b                      | 3 | DKDGNNTMNIKE | strong |
| C6KRM4_2    |                                |   | DVDGNGKIDFGE | strong |
| C6KRM4_3    |                                |   | DKDGNGYITAE  | strong |
| C6KRM3_1    | T07G12.1a                      | 3 | DKDGNNTMNIKE | strong |
| C6KRM3_2    |                                |   | DVDGNGKIDFGE | strong |
| C6KRM3_3    |                                |   | DKDGNGYITAE  | strong |
| Q94288_1    | CaM related genes<br>protein 3 | 4 | DKDGNGTISIKE | strong |
| Q94288_2    |                                |   | DLDGNGQVEFPE | strong |
| Q94288_3    |                                |   | DRDGNGVITANE | strong |
| Q94288_4    |                                |   | DCDGNGEIDYEE | strong |
| 115534350_1 | CAL-3                          | 4 | DKDGNGTISIKE | strong |
| 115534350_2 |                                |   | DLDGNGQVEFPE | strong |
| 115534350_3 |                                |   | DRDGNGVITANE | strong |
| 115534350_4 |                                |   | DCDGNGEIDYEE | strong |
| 341889270_1 | HP CAEBREN_06721               | 2 | DADRSAGIAIDE | strong |
| 341889270_2 |                                |   | DVDGNGVIDYDE | strong |
| E3LNL5_1    | HP CRE_27132                   | 4 | DADRSAGIAIDE | strong |
| E3LNL5_2    |                                |   | DVDGNGVIDYDE | strong |
| P90802_1    | HP E02A10.3                    | 4 | DADRSAGIAIDE | strong |
| P90802_2    |                                |   | DVDGNGVIDYDE | strong |
| A8Y3P8_1    | HP CBG23534                    | 4 | DADRSAGIAIDE | strong |
| A8Y3P8_2    |                                |   | DVDGNGVIDYDE | strong |
| Q09665_1    | tnc-2                          | 4 | DADGSGEIEFEE | strong |
| Q09665_2    |                                |   | DADGSGTVDFDE | strong |
| A8WSS9_1    | CRE-TNC-2                      | 4 | DADGSGEIEFEE | strong |
| A8WSS9_2    |                                |   | DADGSGTVDFDE | strong |
| Q11083_1    | HP B0563.7                     | 4 | DTDGSGAIGNEE | strong |
| Q11083_2    |                                |   | DADGNGEIDFEE | strong |
| Q11083_3    |                                |   | DQDRNGIITENE | strong |
| Q95XF6_1    | HP Y73B3A.12                   | 4 | DADGNGTIDFPE | strong |
| Q95XF6_2    |                                |   | DKDGNGFISAAE | strong |

|             |                     |   |              |        |
|-------------|---------------------|---|--------------|--------|
| E3MRT8_1    | HP CRE_14767        | 4 | DTDGSGAIGNEE | strong |
| E3MRT8_2    |                     |   | DADGNGEIDFEE | strong |
| E3MRT8_3    |                     |   | DQDRNGIITENE | strong |
| 268580583_1 | HP CBG00175         | 4 | DTDGSGAIGNEE | strong |
| 268580583_2 |                     |   | DADGNGEIDFEE | strong |
| 268580583_3 |                     |   | DQDRNGIITENE | strong |
| 268531200_1 | HP CBG02410         | 4 | DKNGDGRITRQE | strong |
| 268531200_2 |                     |   | DLDGNGCIDIDE | strong |
| 268531200_3 |                     |   | DKNGDGMISIDD | Strong |
| 268531200_4 |                     |   | DLDHDGMIDFQE | strong |
| Q09980_1    | HP F12A10.5         | 4 | DKNGDGRITRQE | strong |
| Q09980_2    |                     |   | DLDGNGCIDIDE | strong |
| Q09980_3    |                     |   | DKNGDGVISIDD | strong |
| Q09980_4    |                     |   | DLDHDGMIDFQE | strong |
| E3M4N3_1    | HP CRE_11951        | 4 | DKNGDGRITRQE | strong |
| E3M4N3_2    |                     |   | DLDGNGCIDIDE | strong |
| E3M4N3_3    |                     |   | DKNGDGVISIDD | strong |
| E3M4N3_4    |                     |   | DLDHDGMIDFQE | strong |
| A8WME8_1    | HP CBG_00175        | 4 | DTDGSGAIGNEE | strong |
| A8WME8_2    |                     |   | DADGNGEIDFEE | strong |
| A8WME8_3    |                     |   | DQDRNGIITENE | strong |
| A8WUD8_1    | HP CBG_02410        | 4 | DKNGDGRITRQE | strong |
| A8WUD8_2    |                     |   | DLDGNGCIDIDE | strong |
| A8WUD8_3    |                     |   | DKNGDGMISIDD | strong |
| B3GEK4_1    | troponin C          | 4 | DADGSGKLEFDE | medium |
| B3GEK4_2    |                     |   | DEDGSGKIEFEE | strong |
| E3MX54_1    | CRE-PAT-10          | 4 | DADGSGKLEFDE | medium |
| E3MX54_2    |                     |   | DEDGSGKIEFEE | strong |
| A8XC16_1    | HP CBG_11013        | 4 | DANNDGRITIDE | strong |
| A8XC16_2    |                     |   | DNDQNGVITFDE | strong |
| A8XC16_3    |                     |   | DKDKDGFIEKME | strong |
| A8XC16_4    |                     |   | DIDGDGKISFEE | strong |
| Q18136_1    | Vitellogenin-linked | 4 | DLNGDGYIQREE | strong |
| Q18136_2    |                     |   | DKDCDGNIDFQE | strong |
| Q18136_3    |                     |   | DVDGDGYITRSE | strong |
| Q18136_4    |                     |   | DQNNDGKINFQE | strong |
| G0M8G3_1    | CBN-CAL-5           | 4 | DLNGDGFQREE  | strong |
| G0M8G3_2    |                     |   | DKDCDGNIDFQE | strong |
| G0M8G3_3    |                     |   | DVDGDGYITRSE | strong |
| G0M8G3_4    |                     |   | DQNNDGKINFQE | strong |
| G0N500_1    | HP CAEBREN_26130    | 4 | DANNDGRITIDE | strong |
| G0N500_2    |                     |   | DNDQNGVITFDE | strong |
| G0N500_3    |                     |   | DKDKDGFIEKME | strong |
| G0N500_4    |                     |   | DIDGDGKISFEE | strong |

|             |                  |   |              |        |
|-------------|------------------|---|--------------|--------|
| E3LE72_1    | CRE-CAL-5        | 4 | DLNGDGFIQREE | strong |
| E3LE72_2    |                  |   | DKDHDGNIDFQE | strong |
| E3LE72_3    |                  |   | DVDGDGYITRSE | strong |
| E3LE72_4    |                  |   | DQNNDGKINFQE | strong |
| Q21165_1    | K03A1.4 a        | 4 | DANNDGRITIDE | strong |
| Q21165_2    |                  |   | DNDQNGVITFDE | strong |
| Q21165_3    |                  |   | DKDKDGFIEKME | strong |
| Q21165_4    |                  |   | DIDGDGKISFEE | strong |
| A8XK99_1    | CBR-UVT-2        | 4 | DLNGDGFIQREE | strong |
| A8XK99_2    |                  |   | DKDHDGNIDFQE | strong |
| A8XK99_3    |                  |   | DVDGDGYITRSE | strong |
| A8XK99_4    |                  |   | DQNNDGKINFSE | strong |
| E3LD20_1    | HP CRE_00078     | 4 | DANNDGRITIDE | strong |
| A8XK99_2    |                  |   | DNDQNGVITFDE | strong |
| A8XK99_3    |                  |   | DKDKDGFIEKME | strong |
| A8XK99_4    |                  |   | DIDGDGKISFEE | strong |
| 268580069_1 | HP CBG11013      | 4 | DANNDGRITIDE | strong |
| 268580069_2 |                  |   | DNDQNGVITFDE | strong |
| Q09510      | mlc-4            | 3 | DQNRDGFIDQED | strong |
| 268580069_3 |                  |   | DKDKDGFIEKME | strong |
| 268580069_4 |                  |   | DIDGDGKISFED | strong |
| 115533480_1 | HP K03A1.4       | 4 | DANNDGRITIDE | strong |
| 115533480_2 |                  |   | DNDQNGVITFDE | strong |
| 115533480_3 |                  |   | DKDKDGFIEKME | strong |
| G0MQV0_1    | HP CAEBREN_16765 | 3 | DADNGEIDFEE  | strong |
| G0MQV0_2    |                  |   | DQDRNGIITENE | strong |
| A8X9U2      | CBR-MLC-4        | 1 | DQNRDGFIDQED | strong |
| G0MKR0      | HP CAEBREN_07889 | 2 | DQNRDGFIDQDD | strong |
| G0PGC7_1    | HP CAEBREN_10686 | 4 | DVDGSGSLSVEE | medium |
| G0PGC7_2    |                  |   | DEDNGEVDFRE  | strong |
| G0PGC7_3    |                  |   | DMDRDGFISNGE | strong |
| G0PGC7_4    |                  |   | DKDGDGKISFQE | strong |
| Q20804_1    | CNB-1            | 4 | DVDGSGSLSVEE | medium |
| Q20804_2    |                  |   | DEDNGEVDFRE  | strong |
| Q20804_3    |                  |   | DMDRDGFISNGE | strong |
| Q20804_4    |                  |   | DKDGDGKISFQE | strong |
| E3MQD1_1    | CRE-CNB-1        | 4 | DVDGSGSLSVEE | medium |
| E3MQD1_2    |                  |   | DEDNGEVDFRE  | strong |
| E3MQD1_3    |                  |   | DMDRDGHISNGE | strong |
| E3MQD1_4    |                  |   | DKDGDGKISFQE | strong |
| E3LTC7      | CRE-MLC-4        | 3 | DQNRDGFIDQED | strong |
| A8XK57_1    | HP CBG14543      | 4 | DVDKDGRLSRNE | strong |
| A8XK57_2    |                  |   | DTDKTGKISKEE | strong |
| A8XK57_3    |                  |   | DSDGDGAITEDE | strong |

|             |                  |   |              |        |
|-------------|------------------|---|--------------|--------|
| A8XK57_4    |                  |   | DLNGDGKITFFE | strong |
| A8XVF9      | HP CBG_19361     | 4 | DEDCDGLIETEE | strong |
| Q20358_1    | HP F43C9.2       | 4 | DVDKDGRLSRNE | strong |
| Q20358_2    |                  |   | DTDKTGKISKEE | strong |
| Q20358_3    |                  |   | DSDGDGAITEDE | strong |
| Q20358_4    |                  |   | DLNGDGKITFFE | strong |
| 341874474_1 | HP CAEBREN_15606 | 4 | DVDKDGRLSRNE | strong |
| 341874474_2 |                  |   | DTDKTGKISKEE | strong |
| 341874474_3 |                  |   | DSDGDGAITEDE | strong |
| 341874474_4 |                  |   | DLNGDGKITFFE | strong |
| E3LEB5_1    | HP CRE_00789     | 4 | DVDKDGRLSRNE | strong |
| E3LEB5_2    |                  |   | DTDKTGKISKEE | strong |
| E3LEB5_3    |                  |   | DSDGDGAITEDE | strong |
| E3LEB5_4    |                  |   | DLNGDGKITFFE | strong |
| 268559254   | HP CBG19361      | 1 | DEDCDGLIETEE | strong |
| G0NPN1      | HP CAEBREN_20342 | 1 | DEDCDGLIETDD | strong |
| E3MHC8      | HP CRE_22883     | 2 | DEDCDGLIETDD | strong |
| 17560804    | HP F40F9.8       | 5 | DEDSGLIETDD  | strong |
| E3N7H9_1    | HP CRE_13655     | 4 | DKDRSGQISSDE | strong |
| E3N7H9_2    |                  |   | DSNGDGAINFSE | strong |
| E3N7H9_3    |                  |   | DTDGSGNIDKTE | strong |
| E3N7H9_4    |                  |   | DRSHSNRINFDD | medium |
| Q95Y96_1    | HP M04F3.4       | 5 | DKDRSGQISSDE | strong |
| Q95Y96_2    |                  |   | DSNGDGAINFQE | strong |
| Q95Y96_3    |                  |   | DTDGSGNIDKSE | strong |
| Q95Y96_4    |                  |   | DRSHSNRINFDD | medium |
| 351050110_1 | M04F3.4 a        | 4 | DKDRSGQISSDE | strong |
| 351050110_2 |                  |   | DSNGDGAINFQE | strong |
| 351050110_3 |                  |   | DTDGSGNIDKSE | strong |
| 351050110_4 |                  |   | DRSHSNRINFDD | medium |
| 17561748_1  | HP F59D6.7       | 2 | DLNKNNYITREE | strong |
| 17561748_2  |                  |   | DQDRDGKISFED | strong |
| Q9TZM5_1    | bath-25          | 4 | DKDGDGFISVAE | strong |
| Q9TZM5_2    |                  |   | DISGDGLVDLEE | medium |
| O16343_1    | F59D6.7          | 5 | DLNKNNYITREE | strong |
| O16343_2    |                  |   | DQDRDGKISFED | strong |
| A8XLP7_1    | HP CBG15199      | 6 | DADNDGKLSEKE | strong |
| A8XLP7_2    |                  |   | DLDRNGHLDISE | strong |
| A8XLP7_3    |                  |   | DSNGDNRLDQLE | strong |
| A8XLP7_4    |                  |   | DKNQDGYLTENE | strong |
| E3MSP5_1    | HP CRE_16173     | 5 | DANNDGKLSEKE | strong |
| E3MSP5_2    |                  |   | DLDRNGHLDISE | strong |
| E3MSP5_3    |                  |   | DLNDDGIVDKAE | medium |
| E3MSP5_4    |                  |   | DVNQDGQLTYEE | strong |

|           |                  |   |               |        |
|-----------|------------------|---|---------------|--------|
| E3MSP5_5  |                  |   | DSNGDNRLDQLE  | medium |
| E3MSP5_6  |                  |   | DKNQDGYLQENE  | medium |
| A8WVU5_1  | HP CBG03955      | 4 | DKDRSGQISADE  | strong |
| A8WVU5_2  |                  |   | DSNGDGAINFQE  | strong |
| A8WVU5_3  |                  |   | DTDGSGNIDKTE  | strong |
| A8WVU5_4  |                  |   | DRSHSNRINFDD  | medium |
| E3N4M5    | HP CRE_29149     | 4 | DQNRDGLIDQDD  | medium |
| G0N5F2_1  | HP CAEBREN_02194 | 3 | DDDGS GTISSSE | strong |
| G0N5F2_2  |                  |   | DVSGDGQIDFEE  | strong |
| G0N5F2_3  |                  |   | DKNPEKVISAE   | medium |
| A8VT39    | Spectrin         | 2 | DPNRDGYVTLQE  | strong |
| E3MML2    | HP CRE_03312     | 2 | DQNKDGVIDKSD  | medium |
| Q21408    | SPC-1            | 2 | DPNRDGYVTLQE  | medium |
| E3LCP1    | CRE-SPC-1        | 2 | DPNRDGYVTLQE  | medium |
| 268578695 | CBR-SPC-1        | 2 | DPNRDGYVTLQE  | medium |
| 341874657 | CBN-SPC-1        | 2 | DPNRDGYVTLQE  | medium |
| G2J6D1    | CBR-MLC-2.2      | 3 | DQNKDGVIDKSD  | medium |
| A8WWQ4_1  | CBR-NCS-2        | 4 | DTDNSGFIDFKE  | strong |
| A8WWQ4_2  |                  |   | DIDGNGTIDEKE  | strong |
| A8WWQ4_3  |                  |   | DVNNDKELTLKE  | medium |
| A8X5Q4    | CBR-NCS-3        | 2 | DVDKDG FITKDE | medium |
| A8X9R8_1  | Uncharacterized  | 4 | DLNKSGTITKDE  | Medium |
| A8X9R8_2  |                  |   | DRDGDGYITFQE  | strong |
| A8XBR6_1  | CBR-PAT-10       | 4 | DADGSGKLEFDE  | medium |
| A8XBR6_2  |                  |   | DEDGSGKIEFEE  | strong |
| A8WPJ8_1  | CBR-CMD-1        | 3 | DKDGDGTITTKE  | strong |
| A8WPJ8_2  |                  |   | DADGNGTIDFPE  | strong |
| A8WPJ8_3  |                  |   | DKDGN GFISAAE | strong |
| A8WPJ8_4  |                  |   | DIDGDGQVNYEE  | strong |
| A8XQM5    | Uncharacterized  | 3 | DNDGNGTINFQE  | strong |
| A8WYJ2_1  | Uncharacterized  | 3 | DEDDNGNIDRDE  | strong |
| A8WYJ2_2  |                  |   | DENNDG TLSYPE | medium |
| A8X2U3    | Uncharacterized  | 4 | DEDDNGNIDRDE  | strong |
| A8XEQ0_1  | Uncharacterized  | 4 | DADGSGKLEFDE  | medium |
| A8XEQ0_2  |                  |   | DEDGSGKIEFEE  | strong |
| B3GD87    | Troponin C       | 2 | DEDGSGKIEFEE  | strong |
| D1P8J5_1  | Uncharacterized  | 2 | DEDGN GFISVAE | strong |
| D1P8J5_2  |                  |   | DIDRNGQVDLDE  | strong |
| Q9N2Y1_1  | Uncharacterized  | 3 | DLNKSGTITKDE  | medium |
| Q9N2Y1_2  |                  |   | DRDGDGFITFQE  | strong |
| Q9XXN7    | F21A10.1a        | 2 | DNDGNGTINFQE  | strong |
| Q9U2A6    | Y48B6A.6a        | 2 | DEDQDGKISQRE  | strong |
| Q3V5K4_1  | Uncharacterized  | 4 | DEDGN GFISVAE | strong |
| Q3V5K4_2  |                  |   | DIDRNGQVDLDE  | strong |

|          |                  |   |               |        |
|----------|------------------|---|---------------|--------|
| A8XMZ5   | Y48B6A.6c        | 2 | DEDQDGKISQRE  | strong |
| Q8I0Z7   | Y48B6A.6b        | 1 | DEDQDGKISQRE  | strong |
| Q18874_1 | C56A3.6a         | 4 | DEDDNGNIDRDE  | strong |
| Q18874_2 |                  |   | DENNDGTLSTYPE | medium |
| Q95ZR9_1 | calcium sensor 3 | 2 | DDNHDGHISFSE  | strong |
| Q95ZR9_2 |                  |   | DVDKDGFIKDE   | strong |
| A6PVB9   | F21A10.1b        | 3 | DNDGNGTINFQE  | strong |
| O76670_1 | Uncharacterized  | 6 | DANNDGKLSEKE  | medium |
| O76670_2 |                  |   | DLDRNGHLDISE  | strong |
| O76670_3 |                  |   | DLNDDGIVDKA   | medium |
| O76670_4 |                  |   | DTNRDGQLTYAE  | medium |
| O76670_5 |                  |   | DANGDNKLDQLE  | medium |
| O76670_6 |                  |   | DKNQDGYLTENE  | medium |
| A8X1E0   | CBR-PLC-4        | 1 | DTNKNGLLSFDE  | medium |
| Q21754   | PLC4             | 3 | DTNKNGLLSFDE  | medium |
| A8Y4A7   | Uncharacterized  | 3 | DMDRDRKLTFFEE | strong |
| A8X8U9_1 | Uncharacterized  | 5 | DLNKNDYITREE  | strong |
| A8X8U9_2 |                  |   | DADRDGKISFEE  | strong |
| A8X3T5_1 | CBR-CBN-1        | 8 | DTNHDNVLDARE  | medium |
| A8X3T5_2 |                  |   | DTDRDGLLSLQE  | strong |
| A8X3T5_3 |                  |   | DLNGDGHISVDE  | medium |
| A8X3T5_4 |                  |   | DADNSGTLTLDE  | medium |
| A8X3T5_5 |                  |   | DTNGDGLVSTAE  | medium |
| A8X3T5_6 |                  |   | DLDGNDAVTFDE  | strong |
| Q22157   | T04F3.2          | 8 | DLNKDRKLTFFEE | medium |
| Q23643_1 | ZK856.8          | 2 | DLNKNDYITREE  | Strong |
| Q23643_2 |                  |   | DADRDGKISFDE  | strong |
| A8WU59   | CBR-EHS-1        | 1 | DQDKDGSLDRIE  | strong |
| A8WJ38   | CBR-REPS-1       | 2 | DVNEDGWLDLQE  | medium |
| A8XUA4   | CBR-RME-1        | 1 | DIDKDGQLDADE  | strong |
| A8WN16   | CBR-ITSN-1       | 1 | DLDKDGRLDIRE  | strong |
| Q9N5B7   | RME-1, isoform a | 1 | DIDKDGQLDADE  | strong |
| Q8WSP1   | RME-1, isoform e | 1 | DIDKDGQLDADE  | strong |
| Q86S80   | RME-1, isoform f | 1 | DIDKDGQLDADE  | strong |
| Q966F0   | RME-1, isoform d | 1 | IDKDGQLDADE   | Medium |
| Q9N5B8   | RME-1, isoform b | 2 | DIDKDGQLDADE  | strong |
| Q9U2T9_1 | Y116A8C.36a      | 2 | DLDKDGRLDIRE  | strong |
| Q9U2T9_2 |                  |   | DVNKDGKLSVDE  | medium |
| Q9BIF4   | EHS-1            | 1 | DQDKDGNLDRIE  | strong |
| Q8MYM6   | Y39B6A.38        | 1 | DVNEDGWLDLNE  | medium |

CaBP- Calcium Binding Protein; HP - Hypothetical Protein; PLC- Phospholipase C; RME – Receptor Mediated Endocytosis; PAT 10 - Paralyzed arrest at two-fold protein 10; NCS - Neuronal Calcium Sensor, MLC- Myosin Light chain; SPC- Spectrin; EF hand no.– Number of EF hands.
